# Supplementary material for: Highly active CAR T cells that bind to a juxtamembrane region of mesothelin and are not blocked by shed mesothelin
Source: PubMed Central journal article supplement — Proc Natl Acad Sci U S A. 2022 May 5;119(19):e2202439119. doi: 10.1073/pnas.2202439119 (PMC9171807; doi:10.1073/pnas.2202439119), 2022-05-05
Supplement: pnas.2202439119.sapp.pdf [file pnas.2202439119.sapp.pdf]

## Supplementary Table 1

### Sequence of major mesothelin isoform 622 amino acids

MALPTARPLLGSCGTPALGSLLFLLFSLGWVQPSRT  
LAGETGQEAAPLDGVLANPPNISSLSPRQLLGFP  
CAEVSGLSTERVRELAVALAQKNVKLSTEQLRC  
LAHRLSEPPEDLDALPLDLLLFLNPDAFSGPQACTRFFSRITKANVDLLPRGAPERQRLLPAALACW  
GVRGSLLSEADVRLGGLACDLPGRFVAESA  
EVLLPRLVSCPGLDQDQQEAARAALQGGGPPYG  
PPSTWSVSTMDALRGLLPVLGQPIIRSIPQGIVA  
AWRQRSSRDPSWRQP  
PERTILRPRFRR

**EVEKTACPSGKKAREIDESLIFYKKWELEACVDA  
ALLATQMDRVNAIPFTYEQLDVLKHKLDELYP  
QGYPESVIQHLGYLFLKMSPEDIRKWNVTSLE  
TLKALLEVNKGHEMSPQVATLIDRFVKGRGQLD  
KDTLDTLTAFYPGYLCSLSPEELSSVPPSSIWA  
VRPQDLDTCDPRQLDVLYPKARLAFQNMNGSEY  
FVKIQSFLGGAPTE  
DLKALSQQNVSM  
DLATFMKLRTDAVL  
PLTVAEVQKLLGPH  
VEGLKAEERHR  
PVRDWILRQRQDD  
LDTLGLGLQGGIP  
NGYLVLDLSMQEALS  
GTPCLLGP  
GPVLT  
VLALLASTLA\***

1-36 signal seq

37-296 MPF

296-598 Membrane bound MSLN

599-622 GPI addition seq

## Supplementary Table 2

### Cleavage sites in mesothelin shed from A431/H9 cells

| Sequence Number            |                                                               | Relative %  |
|----------------------------|---------------------------------------------------------------|-------------|
| 1                          | <sup>568</sup> <b>QDDLDTLGLGLQGGIPN</b> <sup>584</sup>        | <b>29.0</b> |
| 2                          | <sup>568</sup> <b>QDDLDTLGLGLQGGIPNGY</b> <sup>586</sup>      | <b>11.0</b> |
| 3                          | <sup>568</sup> QDDLDTLGLGLQGGIPNGYL <sup>587</sup>            | 2.0         |
| 4                          | <sup>568</sup> QDDLDTLGLGLQGGIPNGYLV <sup>588</sup>           | 1.0         |
| 5                          | <sup>568</sup> QDDLDTLGLGLQGGIPNGYLVLD <sup>590</sup>         | 2.0         |
| 6                          | <sup>568</sup> <b>QDDLDTLGLGLQGGIPNGYLVLDL</b> <sup>591</sup> | <b>54.0</b> |
| 7                          | <sup>568</sup> QDDLDTLGLGLQGGIPNGYLVLDLS <sup>592</sup>       | 0.2         |
| <i>C-terminal Sequence</i> | <sup>568</sup> QDDLDTLGLGLQGGIPNGYLVLDLSVQEALS <sup>598</sup> |             |

## Supplementary Table 3

### Cleavage sites in mesothelin from human ascites

| Sequence Number                                                                                                | Relative %  |
|----------------------------------------------------------------------------------------------------------------|-------------|
| 1 <sup>568</sup> QDDLDTLGL <sup>576</sup>                                                                      | 5.7         |
| 2 <sup>568</sup> QDDLDTLGLGL <sup>578</sup>                                                                    | 7.1         |
| 3 <sup>568</sup> QDDLDTLGLGLQ <sup>579</sup>                                                                   | 2.2         |
| <b>4 <sup>568</sup>QDDLDTLGLGLQGGIPN <sup>584</sup></b>                                                        | <b>11.3</b> |
| 5 <sup>568</sup> QDDLDTLGLGLQGGIPNG <sup>585</sup>                                                             | 0.5         |
| <b>6 <sup>568</sup>QDDLDTLGLGLQGGIPNGY <sup>586</sup></b>                                                      | <b>10.3</b> |
| 7 <sup>568</sup> QDDLDTLGLGLQGGIPNGYL <sup>587</sup>                                                           | 5.8         |
| 8 <sup>568</sup> QDDLDTLGLGLQGGIPNGYLV <sup>588</sup>                                                          | 1.6         |
| 9 <sup>568</sup> QDDLDTLGLGLQGGIPNGYLVL <sup>589</sup>                                                         | 8.6         |
| 10 <sup>568</sup> QDDLDTLGLGLQGGIPNGYLVLD <sup>590</sup>                                                       | 3.2         |
| <b>11 <sup>568</sup>QDDLDTLGLGLQGGIPNGYLVLDL <sup>591</sup></b>                                                | <b>43.0</b> |
| 12 <sup>568</sup> QDDLDTLGLGLQGGIPNGYLVLDLSMQE <sup>595</sup>                                                  | 0.1         |
| 13 <sup>568</sup> QDDLDTLGLGLQGGIPNGYLVLDLSMQEA <sup>596</sup>                                                 | 0.6         |
| <i>C-terminal</i> <sup>568</sup> QDDLDTLGLGLQGGIPNGYLVLDLSMQEALS <sup>59</sup><br><i>Sequence</i> <sup>8</sup> |             |

## Supplementary Table 4

Supplemental Table 4. Interactions between antigen peptide and Fab of Mab 15B6

| Peptide residue | Heavy chain residue | Distance (Å)      | Light chain residue     | Distance (Å) |
|-----------------|---------------------|-------------------|-------------------------|--------------|
| Y586            | Y54                 | 3.5               |                         |              |
| Y586            | T30                 | 2.63 <sup>^</sup> |                         |              |
| Y586            | S28                 | 3.35 <sup>^</sup> |                         |              |
| L587            | None~               |                   |                         |              |
| V588            | N52                 | 3.5               |                         |              |
| V588            | Y33                 | 3.64              |                         |              |
| V588            | Y54                 | 3.67              |                         |              |
| L589            | None~               |                   |                         |              |
| D590            | R50                 | 2.69              |                         |              |
| D590            | H35                 | 3.14              |                         |              |
| D590            | H <sub>2</sub> O167 | 2.66              | H <sub>2</sub> O167-W98 | 2.94         |
| L591            | Y32                 | 3.95              |                         |              |
| L591            | R98                 | 3.59              |                         |              |
| L591            | E99                 | 3.76              |                         |              |
| S592            | L100*               | 2.99              |                         |              |
| S592            |                     |                   | N36                     | 2.80         |
| S592            |                     |                   | W98                     | 3.63         |
| M593            |                     |                   | W93                     | 3.53         |
| M593            |                     |                   | Y34                     | 3.49         |
| Q594            |                     |                   | A51                     | 3.71         |
| Q594            |                     |                   | N55                     | 3.53         |
| E595            |                     |                   | Y34                     | 2.82         |
| A596            |                     |                   | T53                     | 3.69         |
| A596            |                     |                   | N54*                    | 3.72/2.78    |
| A596            |                     |                   | T31                     | 3.78         |
| L597            |                     |                   | N55                     | 3.15         |
| L597            |                     |                   | N54*                    | 2.92         |

<sup>^</sup> Hydrogen bonding interaction

~ Residue side chain is not involved in contacting Fab

\* Main chain atoms are involved in contact

## Supplementary Table 5

### Mouse 15B6 amino acid sequence used in CAR-T

QAVVTQESALTTSPGETVTLTCRSSTGAVTTGNYPNWWQEKPDLFTGLIAGTNNRAPGVPARFSGSLIGDKA  
ALTITGAQTEDEAIYFCALWFSSHWVFGGGTKLTVLGGGGSGGGGSGGGGSEVQLQQSGPVLVKPGASVKIS  
CKASGYSFTGYMHWRQSLVKRLEWIGRINPYTGVPSYKHNFKDKASLTVDKSSSTAYMELHSLTSEDSAVY  
YCARELGGYWGQGTTTLTVSS

Blue, VL sequence of 15B6

Red, linker sequence

Purple, VH sequence of 15B6

# Supplementary Figure 1

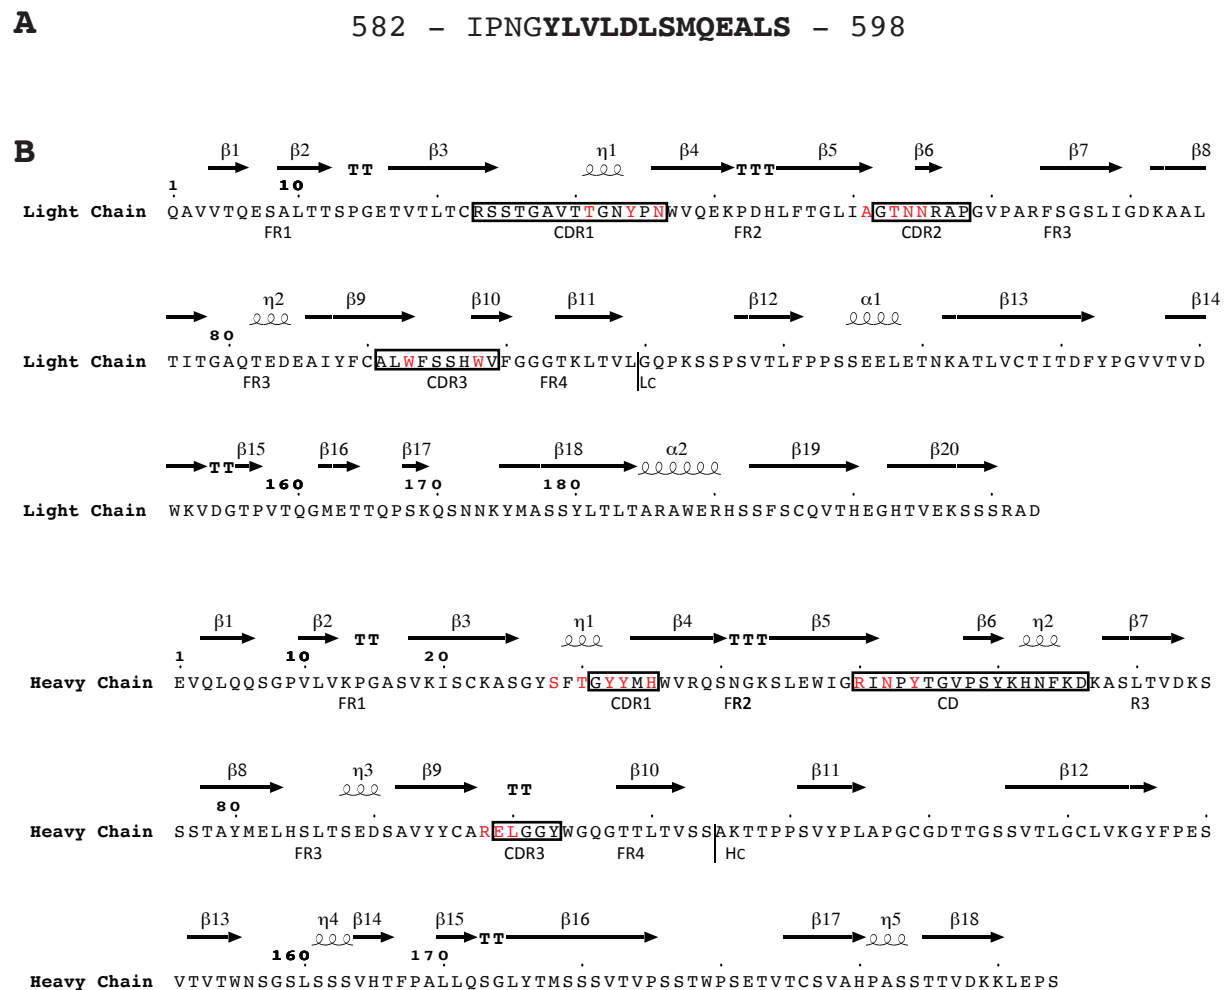

**Supplemental Figure 1.** (A) The sequence of the peptide used in making the Fab/peptide complex. Residues that contact Fab are highlighted in boldface. (B) Sequences and secondary structure assignments of Fab light and heavy chains for Mab 15B6 are shown. Residue numbering is consistent with prior literature. CDRs are assigned according to the improved Chothia method and highlighted in boxes. The constant domains of the heavy and light chains are demarcated by a vertical line and indicated as CH and CL, respectively. The secondary structure elements are determined from the crystal structure and are annotated above the corresponding sequence with b-strands shown as arrows and a-helices as wiggly lines. Residues that make contacts with mesothelin peptide are colored in red.

## Supplementary Figure 2

### Tissue array showing 15B6 does not specifically bind to normal tissues

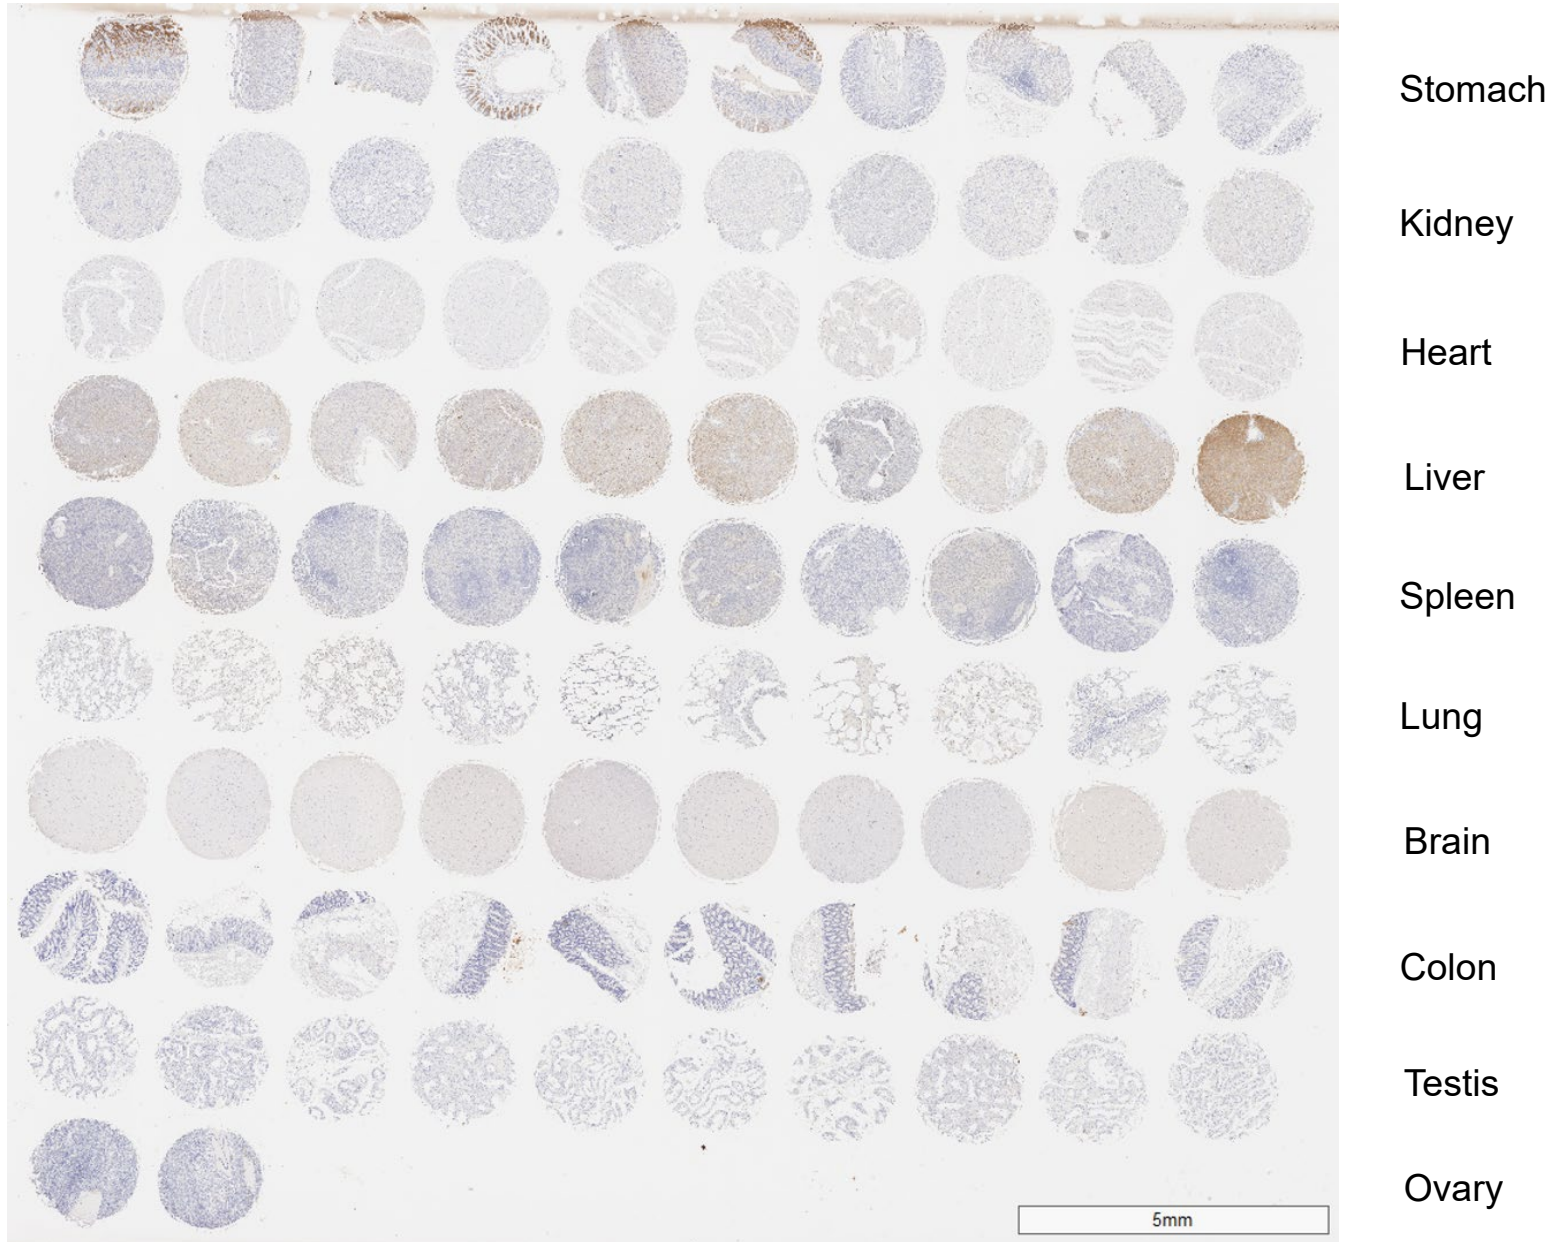

Supplementary  
Figure 3

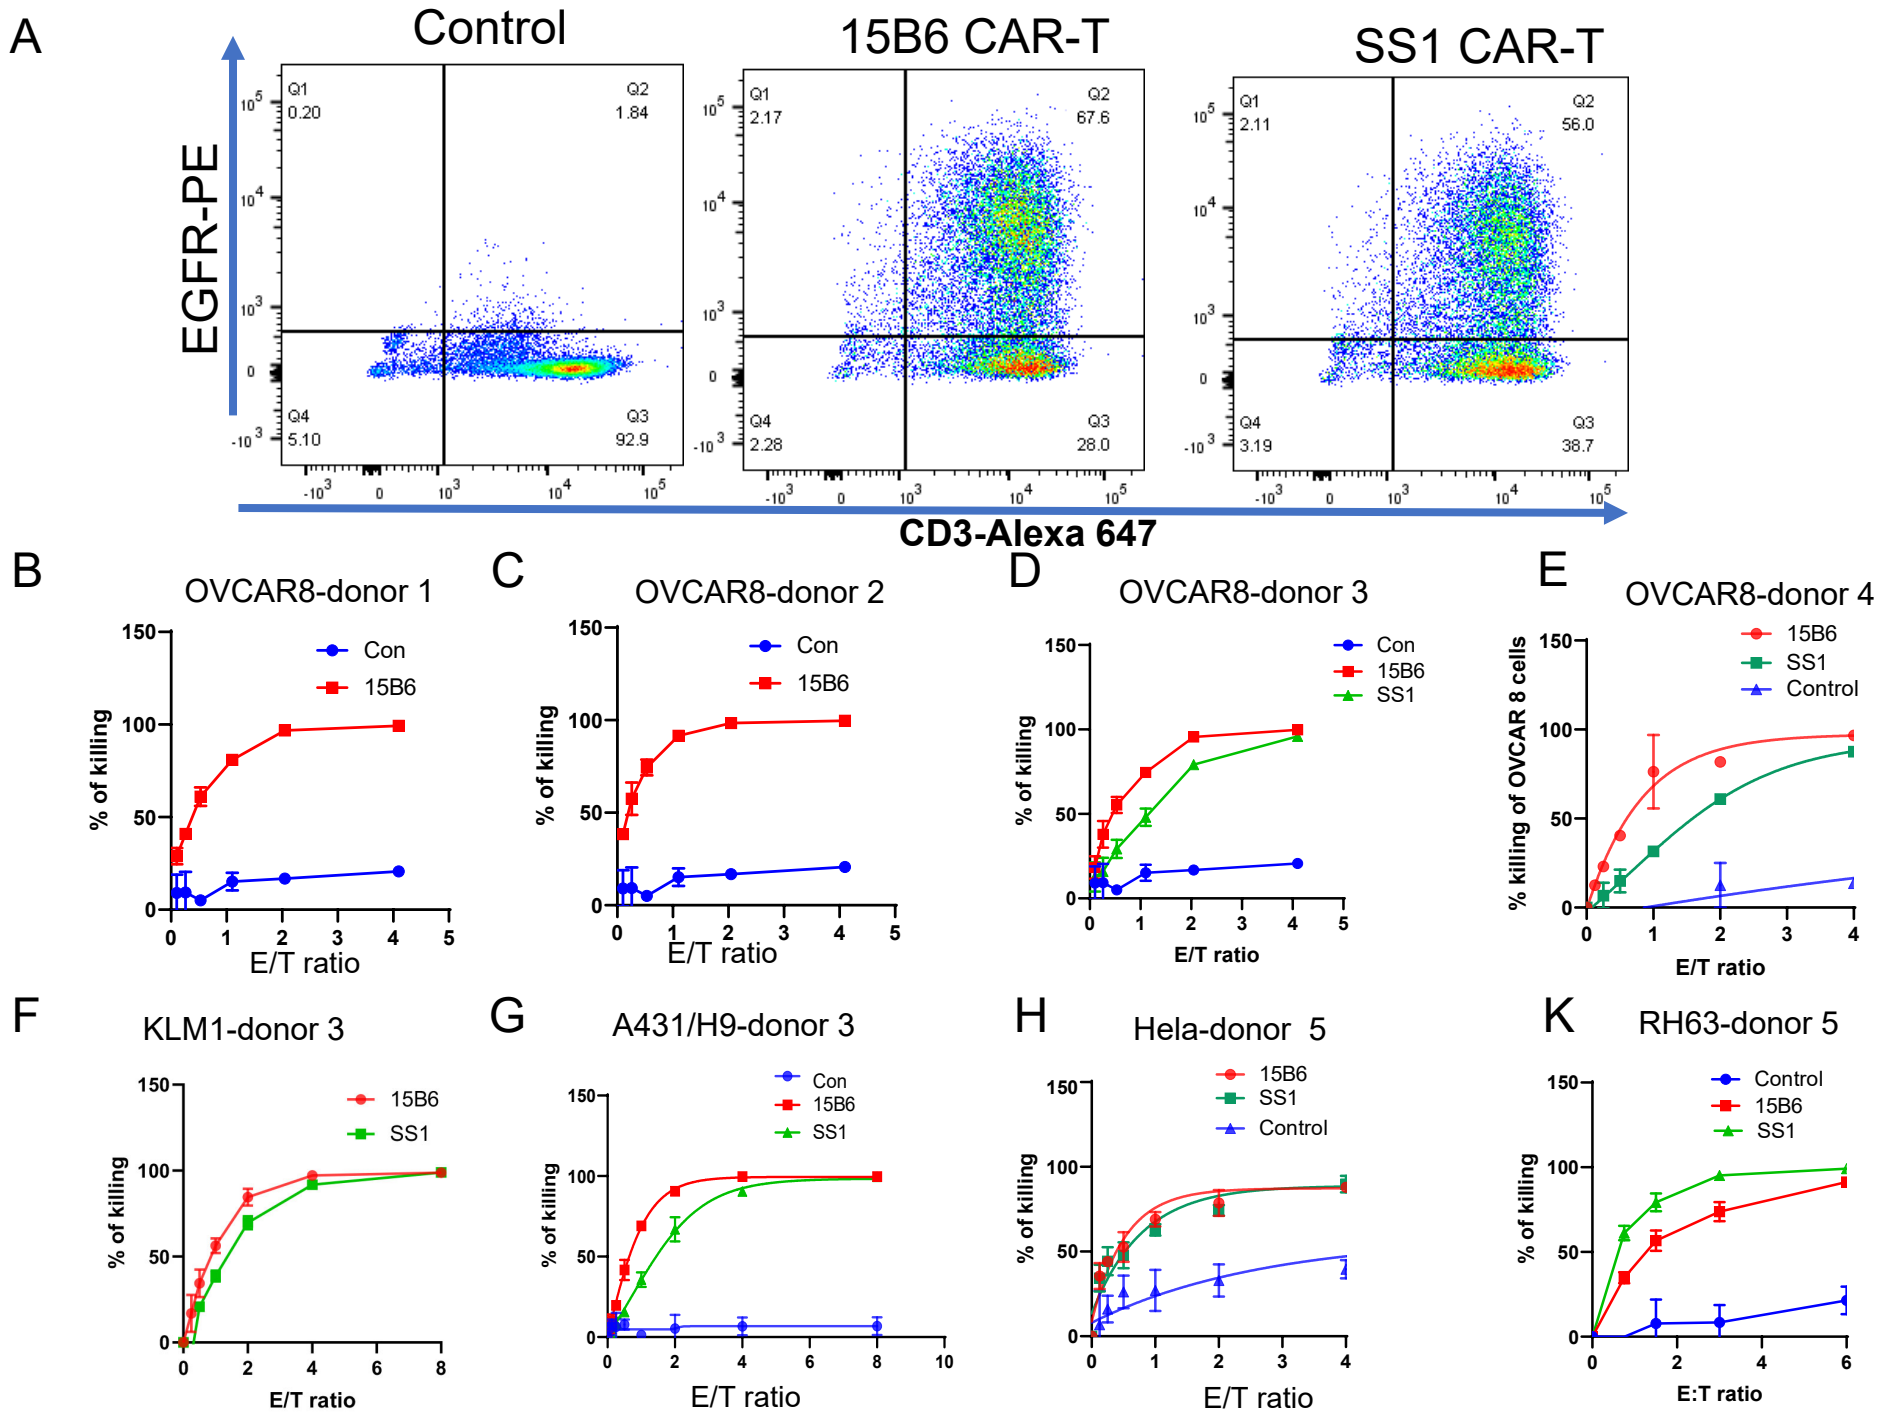



Supplementary Figure 3. **Transduction of CAR- T cells and its cytotoxicity tests in vitro.** A. Typical transduction efficiency of CAR-T cells. Lentivirus containing either 15B6 or SS1 CART vector were transduced into human PBMC. After 8 days of culture, the cells were stained with anti-CD3-Alexa647 and anti-EGFR-PE. Control is mock transduced cells. B-E. CAR-T cells made from 4 different donors were tested for the killing of OVCAR8-luc cells. F-H. CAR-T cells made with indicated donors were tested for the killing of cell lines, KLM1-luc (F), A431/H9-luc (G), Hela-luc (H) and primary mesothelioma line RH63-luc.

## Supplementary Figure 4.

A

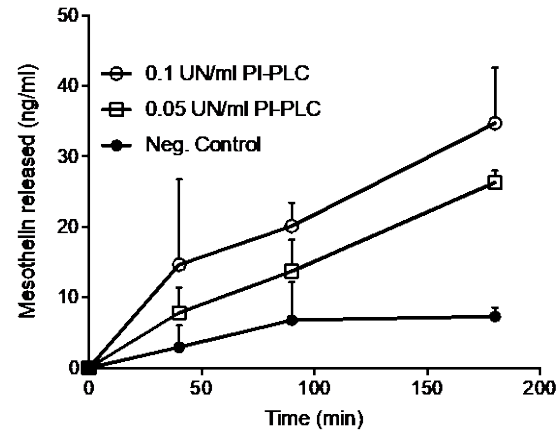

B

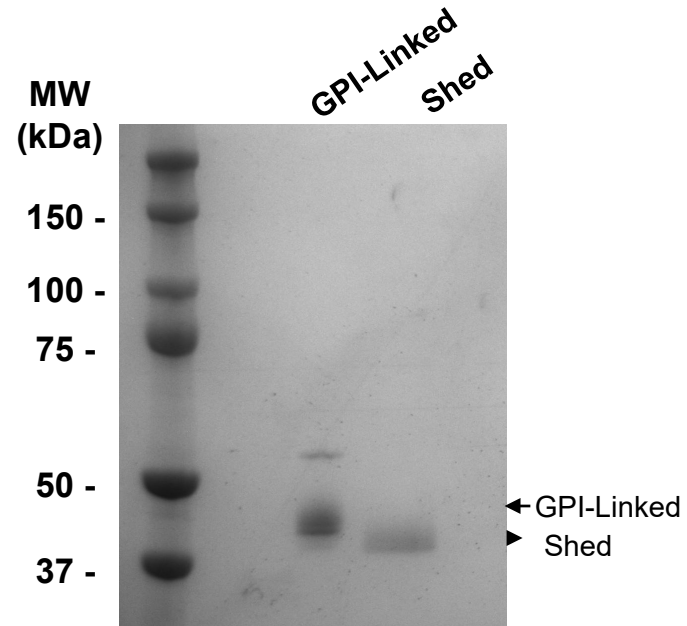

**Generation of GPI-MSLN and comparison with shed MSLN** A. Shed mesothelin concentrations were measured after treating A431/H9 cells with PI-PLC by Mesoscale assay. B. Non-reducing SDS-PAGE analysis comparing molecular weights of GPI-linked mesothelin and shed mesothelin.
